# Supplementary material for: Molecular identification of avian influenza virus subtypes H5N1 and H9N2 in birds from farms and live bird markets and in respiratory patients
Source: PeerJ. 2018 Sep 5;6:e5473. doi: 10.7717/peerj.5473 (PMC6129142; doi:10.7717/peerj.5473)
Supplement: Data S1 [file peerj-06-5473-s001.xlsx]

## Sheet: Human
Respirtory patients addmitted to public hospital at Sharkia Governerates
ID	Cases	Gender	Age	Education	Residence	Occupation	Info_AIV	Info_source	AIV_infectious	AIV_transmission	AIV_signs	Raising_Poultry	Preventive_measures	Health_care	Vaccination
1	Negative	Male	≥50 years	Illiterate	Rural	Farmer	Yes	Tv	Don't know	No	No	Yes	No	Myself	No
2	Negative	Male	≥50 years	Illiterate	Rural	Farmer	No	Non	Don't know	No	No	Yes	No	Myself	No
3	Negative	Female	20-49 years	Illiterate	Rural	Household	Yes	Tv	Don't know	No	No	Yes	No	Myself	No
4	Positive	Female	≥50 years	Illiterate	Rural	Household	Yes	Tv	Don't know	No	No	Yes	No	Myself	No
5	Negative	Male	≥50 years	Illiterate	Rural	Farmer	Yes	Tv	Don't know	No	No	Yes	No	Myself	No
6	Negative	Male	20-49 years	University	Urban	Employer	Yes	Tv	Yes	Yes	yes	No	No	Hospital	Yes
7	Negative	Female	20-49 years	Secondary	Urban	Household	Yes	Tv	Yes	Yes	yes	Yes	No	Myself	No
8	Negative	Female	≤19 years	Secondary	Urban	Student	No	Non	Don't know	No	No	No	No	Myself	Yes
9	Negative	Male	≤19 years	Primary	Urban	Student	Yes	Internet	Yes	Yes	Yes	No	No	Myself	Yes
10	Negative	Female	≥50 years	Illiterate	Rural	Household	Yes	Tv	Yes	No	No	Yes	No	Myself	No
11	Negative	Male	≤19 years	High school	Urban	Student	Yes	Internet	Yes	Yes	Yes	No	No	Hospital	Yes
12	Negative	Female	≥50 years	Illiterate	Rural	Household	Yes	Tv	No	No	No	Yes	No	Myself	No
13	Negative	Female	≤19 years	Secondary	Rural	Student	No	Non	Don't know	No	No	Yes	No	Myself	No
14	Negative	Male	≥50 years	University	Urban	Employer	Yes	Tv	Yes	Yes	yes	No	No	Hospital	Yes
15	Negative	Female	20-49 years	High school	Urban	Household	Yes	Internet	Yes	Yes	Yes	Yes	No	Myself	No
16	Negative	Female	≥50 years	Illiterate	Rural	Household	Yes	Tv	No	No	No	Yes	No	Myself	No
17	Negative	Female	20-49 years	Secondary	Rural	Household	Yes	Tv	Yes	Yes	yes	Yes	No	Myself	No
18	Negative	Male	≤19 years	University	Urban	Student	Yes	Internet	Yes	Yes	yes	No	No	Hospital	Yes
19	Negative	Female	20-49 years	High school	Urban	Employer	Yes	Tv	Yes	Yes	Yes	No	No	Hospital	Yes
20	Negative	Male	≥50 years	Illiterate	Rural	Farmer	Yes	Tv	No	No	No	Yes	No	Myself	No
21	Negative	Female	≥50 years	Illiterate	Rural	Household	Yes	Tv	No	No	No	Yes	No	Myself	No
22	Negative	Female	≤19 years	Primary	Rural	Student	No	Non	Don't know	No	No	Yes	Yes	Myself	No
23	Negative	Female	≤19 years	Secondary	Rural	Student	No	Non	Don't know	No	No	Yes	No	Myself	No
24	Positive	Female	≥50 years	Illiterate	Rural	Household	Yes	Tv	Yes	No	No	Yes	No	Myself	No
25	Negative	Male	20-49 years	University	Urban	Employer	Yes	Internet	Yes	Yes	yes	No	No	Hospital	Yes
26	Negative	Male	20-49 years	University	Urban	Employer	Yes	Tv	Yes	Yes	yes	No	No	Hospital	Yes
27	Negative	Female	≤19 years	Secondary	Urban	Student	No	Non	Don't know	No	No	No	No	Myself	Yes
28	Negative	Female	≥50 years	Illiterate	Rural	Household	Yes	Tv	Don't know	No	No	Yes	No	Myself	No
29	Negative	Male	≤19 years	University	Urban	Student	Yes	Internet	Yes	Yes	yes	No	No	Hospital	Yes
30	Negative	Male	20-49 years	High school	Rural	Employer	Yes	Tv	Yes	Yes	Yes	Yes	Yes	Hospital	No
31	Negative	Female	≤19 years	Primary	Rural	Student	Yes	Internet	Yes	Yes	Yes	Yes	No	Myself	No
32	Negative	Female	≥50 years	High school	Urban	Household	Yes	Tv	Yes	Yes	Yes	Yes	Yes	Myself	No
33	Negative	Female	≤19 years	Secondary	Rural	Student	No	Non	Don't know	No	No	Yes	No	Myself	No
34	Negative	Male	≥50 years	Illiterate	Rural	Farmer	Yes	Tv	Don't know	No	No	Yes	No	Myself	No
35	Negative	Female	≥50 years	Illiterate	Rural	Household	Yes	Tv	Don't know	No	No	Yes	No	Myself	No
36	Negative	Male	20-49 years	High school	Urban	Employer	Yes	Tv	Yes	Yes	Yes	No	No	Hospital	Yes
37	Negative	Female	≤19 years	Primary	Urban	Student	Yes	Internet	Yes	Yes	Yes	No	No	Myself	Yes
38	Negative	Female	20-49 years	University	Urban	Employer	Yes	Internet	Yes	Yes	yes	No	No	Hospital	Yes
39	Negative	Female	≥50 years	Secondary	Rural	Household	Yes	Tv	Don't know	No	No	Yes	No	Myself	No
40	Negative	Female	≥50 years	Illiterate	Rural	Household	Yes	Tv	Don't know	No	No	Yes	No	Myself	No
41	Negative	Male	≤19 years	Secondary	Urban	Student	Yes	Tv	Yes	Yes	yes	No	No	Myself	Yes
42	Negative	Female	≥50 years	Illiterate	Rural	Household	Yes	Tv	Don't know	No	No	Yes	No	Myself	No
43	Negative	Male	≥50 years	Illiterate	Rural	Farmer	Yes	Tv	Don't know	No	No	Yes	No	Myself	No
44	Negative	Male	20-49 years	University	Urban	Employer	Yes	Internet	Yes	Yes	yes	No	No	Hospital	Yes
45	Negative	Male	20-49 years	University	Urban	Employer	Yes	Tv	Yes	Yes	yes	No	No	Hospital	Yes
46	Negative	Female	≤19 years	Secondary	Urban	Employer	Yes	Tv	Yes	Yes	yes	No	No	Myself	Yes
47	Negative	Female	20-49 years	Secondary	Rural	Household	Yes	Tv	Yes	Yes	yes	Yes	No	Myself	No
48	Negative	Female	20-49 years	High school	Rural	Household	Yes	Internet	Yes	Yes	Yes	Yes	No	Myself	No
49	Negative	Male	≥50 years	Illiterate	Rural	Farmer	Yes	Tv	Don't know	No	No	Yes	No	Myself	No
50	Negative	Female	20-49 years	High school	Urban	Household	Yes	Internet	Yes	Yes	Yes	Yes	No	Myself	No
51	Negative	Female	20-49 years	University	Urban	Employer	Yes	Tv	Yes	Yes	yes	No	No	Hospital	Yes
52	Negative	Female	≤19 years	Secondary	Urban	Student	Yes	Tv	Don't know	No	No	No	No	Myself	Yes
53	Negative	Female	≤19 years	Primary	Urban	Student	No	Non	Don't know	No	No	No	No	Myself	Yes
54	Negative	Female	≥50 years	Illiterate	Rural	Household	Yes	Tv	Don't know	No	No	Yes	No	Myself	No
55	Negative	Female	≥50 years	Illiterate	Rural	Household	Yes	Tv	No	No	No	Yes	No	Myself	No
56	Negative	Female	20-49 years	High school	Urban	Household	Yes	Tv	Yes	Yes	Yes	Yes	No	Myself	No
57	Negative	Male	≥50 years	University	Urban	Employer	Yes	Tv	Yes	Yes	yes	No	No	Hospital	Yes
58	Negative	Male	≥50 years	Illiterate	Rural	Farmer	No	Non	Don't know	No	No	Yes	No	Myself	No
59	Negative	Male	20-49 years	University	Rural	Employer	Yes	Tv	Yes	Yes	yes	Yes	No	Hospital	No
60	Negative	Female	≥50 years	Illiterate	Rural	Household	Yes	Tv	Don't know	No	No	Yes	No	Myself	No
61	Negative	Female	≥50 years	Illiterate	Rural	Household	Yes	Tv	Don't know	No	No	Yes	No	Myself	No
62	Negative	Female	≤19 years	Secondary	Urban	Student	Yes	Tv	Yes	Yes	yes	No	No	Myself	Yes
63	Negative	Male	≤19 years	University	Urban	Student	Yes	Internet	Yes	Yes	yes	No	No	Hospital	Yes
64	Negative	Female	20-49 years	Primary	Rural	Household	Yes	Tv	Yes	Yes	Yes	Yes	Yes	Myself	No
65	Negative	Female	20-49 years	High school	Rural	Employer	Yes	Tv	Yes	Yes	Yes	Yes	Yes	Hospital	No
66	Negative	Male	20-49 years	University	Urban	Employer	Yes	Tv	Yes	Yes	yes	No	No	Hospital	Yes
67	Negative	Male	≥50 years	Illiterate	Rural	Farmer	No	Non	Don't know	No	No	Yes	No	Myself	No
68	Negative	Female	≥50 years	Illiterate	Rural	Household	Yes	Tv	Don't know	No	No	Yes	No	Myself	No
69	Negative	Female	≥50 years	Illiterate	Rural	Household	Yes	Tv	Don't know	No	No	Yes	No	Myself	No
70	Negative	Male	≤19 years	Primary	Urban	Student	Yes	Tv	Yes	Yes	Yes	No	No	Myself	Yes
71	Negative	Female	≤19 years	Secondary	Urban	Student	No	Non	Don't know	No	No	No	No	Myself	Yes
72	Negative	Male	≥50 years	Illiterate	Rural	Farmer	Yes	Tv	Yes	No	No	Yes	No	Myself	No
73	Negative	Female	≥50 years	Illiterate	Rural	Household	Yes	Tv	Yes	No	No	Yes	No	Myself	No
74	Negative	Male	≥50 years	High school	Rural	Employer	Yes	Tv	Yes	Yes	Yes	Yes	Yes	Hospital	No
75	Negative	Female	20-49 years	University	Urban	Employer	Yes	Internet	Yes	Yes	yes	No	No	Hospital	Yes
76	Negative	Female	≤19 years	Secondary	Rural	Student	No	Non	Don't know	No	No	Yes	No	Myself	No
77	Negative	Female	≤19 years	High school	Rural	Employer	Yes	Internet	Yes	Yes	Yes	Yes	Yes	Hospital	No
78	Negative	Female	≥50 years	High school	Urban	Household	Yes	Tv	Yes	Yes	Yes	Yes	NO	Myself	No
79	Negative	Male	≤19 years	Secondary	Rural	Student	No	Non	Don't know	No	No	Yes	No	Myself	No
80	Negative	Female	≤19 years	Primary	Urban	Student	Yes	Internet	Yes	Yes	Yes	No	No	Myself	Yes
81	Negative	Female	≥50 years	University	Urban	Employer	Yes	Tv	Yes	Yes	yes	No	No	Hospital	Yes
82	Negative	Male	20-49 years	University	Urban	Employer	Yes	Tv	Yes	Yes	yes	No	No	Hospital	Yes
83	Positive	Female	≥50 years	Illiterate	Rural	Household	Yes	Tv	No	No	No	Yes	No	Myself	No
84	Negative	Female	≤19 years	Primary	Rural	Student	Yes	Internet	Yes	Yes	Yes	Yes	Yes	Myself	No
85	Negative	Female	≥50 years	University	Rural	Employer	Yes	Tv	Yes	Yes	yes	Yes	Yes	Hospital	No
86	Negative	Male	≥50 years	Secondary	Rural	Farmer	No	Non	Don't know	No	No	Yes	No	Myself	No
87	Negative	Female	≥50 years	Illiterate	Rural	Household	Yes	Tv	No	No	No	Yes	No	Myself	No
88	Negative	Male	≥50 years	High school	Urban	Employer	Yes	Tv	Yes	Yes	Yes	No	No	Hospital	Yes
89	Negative	Female	20-49 years	High school	Urban	Employer	Yes	Tv	Yes	Yes	Yes	No	No	Hospital	Yes

## Sheet: Farm Birds
Data of examined farm live birds admitted to the to the Clinic of Avian and Rabbit Medicine Department, Faculty of Veterinary Medicine, Zagazig University, Egypt.
Flock #	Locality	Breed	Age	Total No	Mortality	No of submitted bird
I. Examined Pigeons
1	Zagazig	Baladi	1y	200 pair	50 pair	2
2	Zagazig	Romani	1y	60 pair	5 pair	1
3	Minya ElQamh	Baladi	1.5 y	15 pair	4	1
4	Zagazig	Australli	3 y	100 pair	15pair/20d	1
5	Zagazig	remaih	1 y	50 pair	-	1
6	Zagazig	Baladi	2 m	25 pair	-	1
7	Zagazig	Baladi	4 m	10 pair	1	1
8	EL-Tahra	Remaih	3 y	50 pair	20/w	1
9	Zagazig	Baladi	1 y	15 pair	3	2
10	Zagazig	Baladi	3 m	15 pair	1 pair	1
11	Minya EL-Qamh	Baladi	3 m	50 pair	21/day	5
12	Zagazig	Baladi	2 m	60 pair	5 pair/w	1
13	Minya EL-Qamh	Romani	8 m	20 pair	3	1
14	Zagazig	Baladi	2 m	700 pair	100/w	4
15	El-Asher	Hazaz	4 m	50 pair	3/day	1
16	Zagazig	Baladi	1 y	15 pair	1	1
17	EL-Shobak	Foreign	3 m	10 pair	7/2w	1
18	Zagazig	unknown	1.5 y	30 pair	2	1
19	Zagazig	Baladi	1.5y	80 Pair	7	3
20	Abu-hamad	Baladi	4m	12 pair	1	1
II. Examined Ducks
1	Zagazig	Baladi	12m	6 pair	2	1
2	Belbais	Mullard	1m	15 pair	5	1
3	Belbais	Mullard	1m	5000 pair	500/w	4
4	Belbais	Muscovey	19day	12.000 pair	25	5
5	Zagazig	Muscovey	1.5m	40 pair	3	1
6	Zagazig	Muscovey	75day	3000 pair	1500/w	6
7	EL-Shobak	Baladi	4m	15 pair	26/2 days	1
8	Met-Abo Ali	Muscovey	41day	22.000 pair	10/3 days	4
9	AL-Neshow	Baladi	2m	30 pair	-	1
III. Examined Quail
1	Zagazig	------	4 m	200 pair	1 pair	4
