# Supplementary material for: Molecular identification of avian influenza virus subtypes H5N1 and H9N2 in birds from farms and live bird markets and in respiratory patients
Source: PeerJ journal article supplement (doi:10.7717/peerj.5473), 2018-09-05
Supplement: Questionnaire.pdf [file Questionnaire.pdf]

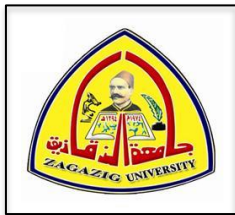

# AIV KNOWLEDGE, PRACTICES AND ATTITUDES IN SHARKIA GOVERNORATES

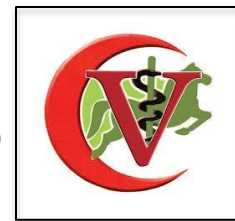

Participant name: ..... Date: .....

Interviewer: .....

Address: .....

## I. DEMOGRAPHIC CHARACTERISTICS

1. Gender:

- Male
- Female

2. Age:

- ≤ 19 years
- 20-49 years
- ≥ 50 years

3. Educational level:

- Illiterate
- Primary school
- Secondary school
- High school
- University
- Other, specify .....

4. Occupations:

- Student
- Employer
- Farmer
- Household
- Other, specify .....

## II. KNOWLEDGE

5. Have you heard about AIV?

- Yes
- No

- 6.** AIV is infectious to humans
- Yes
  - NO
  - Don't know
- 7.** Information source about AIV
- TV
  - Radio
  - Friends
  - News
  - Health facilities
  - None, specify .....
- 8.** Knowledge about methods of AIV transmission
- Yes
  - No
- 9.** Knowledge about symptoms in humans
- Yes
  - No

### III. ATTITUDES AND PRACTICES

- 10.** Do you have direct contact with poultry?
- Yes
  - No
- 11.** Do you use preventive measures during contact with poultry?
- Yes
  - No
- 12.** What will you do if you are sick with fever, sneeze, and cough?
- Purchasing cold medicine by myself
  - Seeking medical service from hospital
  - Other, specify .....
- 13.** Did you administrate any influenzas vaccines?
- Yes
  - No
