# Supplementary material for: Molecular identification of avian influenza virus subtypes H5N1 and H9N2 in birds from farms and live bird markets and in respiratory patients
Source: PeerJ journal article supplement (doi:10.7717/peerj.5473), 2018-09-05

**Supplementary Figure S1.** Amplification curve of human samples for the identification of avian influenza viruses H5N1

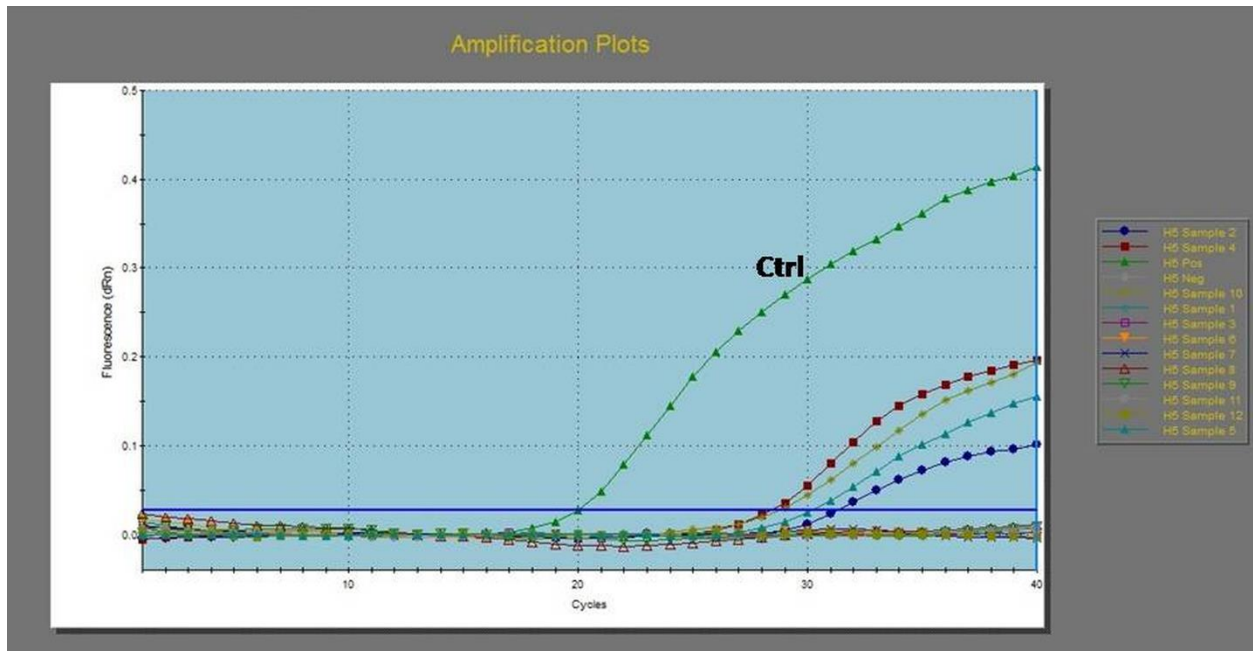

Supplement: Supplementary_Figure_S1.pdf [file Supplementary_Figure_S1.pdf]
